# Supplementary material for: Trends in myopia prevalence among children and adolescents: a large-scale cross-sectional study in Shihezi, China
Source: Research Square preprint supplement (doi:10.21203/rs.3.rs-5811655/v1), 2025-03-27
Supplement: Supplementary file 1 [file 4d6621ba15d3b2c29d8c891e.docx]

| Age | 2018 | | | 2019 | | | 2020 | | | 2021 | | | 2022 | | | 2023 | | |
| --- | --- | --- | --- | --- | --- | --- | --- | --- | --- | --- | --- | --- | --- | --- | --- | --- | --- | --- |
| Myopia | Total | % | Myopia | Total | % | Myopia | Total | % | Myopia | Total | % | Myopia | Total | % | Myopia | Total | % |
| 5 | 28 | 111 | 25.23 | 27 | 211 | 12.8 | 15 | 215 | 6.98 | 10 | 284 | 3.52 | 3 | 73 | 4.11 | 17 | 452 | 3.76 |
| 6 | 61 | 304 | 20.07 | 52 | 449 | 11.58 | 49 | 455 | 10.77 | 53 | 381 | 13.91 | 71 | 602 | 11.79 | 28 | 307 | 9.12 |
| 7 | 63 | 298 | 21.14 | 58 | 437 | 13.27 | 87 | 439 | 19.82 | 99 | 444 | 22.30 | 83 | 322 | 25.78 | 62 | 300 | 20.67 |
| 8 | 100 | 357 | 28.01 | 82 | 414 | 19.81 | 110 | 449 | 24.50 | 139 | 470 | 29.57 | 129 | 344 | 37.5 | 94 | 248 | 37.90 |
| 9 | 130 | 366 | 35.52 | 133 | 414 | 32.13 | 148 | 435 | 34.02 | 162 | 437 | 37.07 | 180 | 364 | 49.45 | 114 | 243 | 46.91 |
| 10 | 157 | 364 | 43.13 | 162 | 466 | 34.76 | 205 | 428 | 47.90 | 194 | 431 | 45.01 | 220 | 387 | 56.85 | 138 | 263 | 52.47 |
| 11 | 170 | 348 | 48.85 | 230 | 488 | 47.13 | 217 | 475 | 45.68 | 251 | 447 | 56.15 | 208 | 343 | 60.64 | 196 | 321 | 61.06 |
| 12 | 182 | 328 | 55.49 | 260 | 479 | 54.28 | 272 | 463 | 58.75 | 275 | 475 | 57.89 | 247 | 374 | 66.04 | 261 | 411 | 63.50 |
| 13 | 192 | 340 | 56.47 | 313 | 509 | 61.49 | 356 | 552 | 64.49 | 367 | 545 | 67.34 | 366 | 530 | 69.06 | 366 | 560 | 65.36 |
| 14 | 219 | 357 | 61.34 | 327 | 467 | 70.02 | 351 | 493 | 71.20 | 392 | 523 | 74.95 | 395 | 524 | 75.38 | 372 | 558 | 66.67 |
| 15 | 250 | 325 | 76.92 | 314 | 439 | 71.53 | 294 | 402 | 73.13 | 428 | 534 | 80.15 | 404 | 504 | 80.16 | 251 | 344 | 72.97 |
| 16 | 538 | 295 | 77.41 | 771 | 376 | 74.64 | 578 | 364 | 73.35 | 786 | 551 | 77.82 | 716 | 355 | 80.09 | 346 | 207 | 81.80 |
| Total | 2090 | 4193 | 49.84 | 2729 | 5806 | 47.00 | 2682 | 5594 | 47.94 | 3156 | 5981 | 52.77 | 3022 | 5261 | 57.44 | 2245 | 4430 | 50.68 |

**Schedule 1** Prevalence of Myopia by age group by year 2018 to 2023.
