# Supplementary material for: Trends in myopia prevalence among children and adolescents: a large-scale cross-sectional study in Shihezi, China
Source: Research Square preprint supplement (doi:10.21203/rs.3.rs-5811655/v1), 2025-03-27
Supplement: Supplementary file 2 [file 9f2655eaab411acece5a4897.docx]

| Age | Myopia | Mild | Moderate | High |
| --- | --- | --- | --- | --- |
| 5 | 100 | 88(88.00) | 11(11.00) | 1(1.00) |
| 6 | 314 | 289(92.04) | 20(6.37) | 5(1.59) |
| 7 | 452 | 404(89.38) | 43(9.51) | 5(1.11) |
| 8 | 654 | 550(84.10) | 97(14.83) | 7(1.07) |
| 9 | 867 | 664(76.59) | 179(20.65) | 24(2.77) |
| 10 | 1076 | 752(69.89) | 288(26.77) | 36(3.35) |
| 11 | 1272 | 800(62.89) | 409(32.15) | 63(4.95) |
| 12 | 1497 | 895(59.79) | 501(33.47) | 101(6.75) |
| 13 | 1960 | 1050(53.57) | 739(37.70) | 171(8.72) |
| 14 | 2056 | 1011(49.17) | 819(39.83) | 226(10.99) |
| 15 | 1941 | 873(44.98) | 833(42.91) | 23512.11) |
| 16 | 3735 | 1423(38.10) | 1655(44.31) | 657(17.59) |
| Total | 15924 | 8799(55.26) | 5594(35.13) | 1531(9.61) |

**Schedule 2** Composition of myopia of different severities in different age groups.
